# Supplementary figures and images for: Non-homologous isofunctional enzymes: A systematic analysis of alternative solutions in enzyme evolution
Source: Springer Nature journal article supplement (doi:10.1186/1745-6150-5-31), 2010-04-30

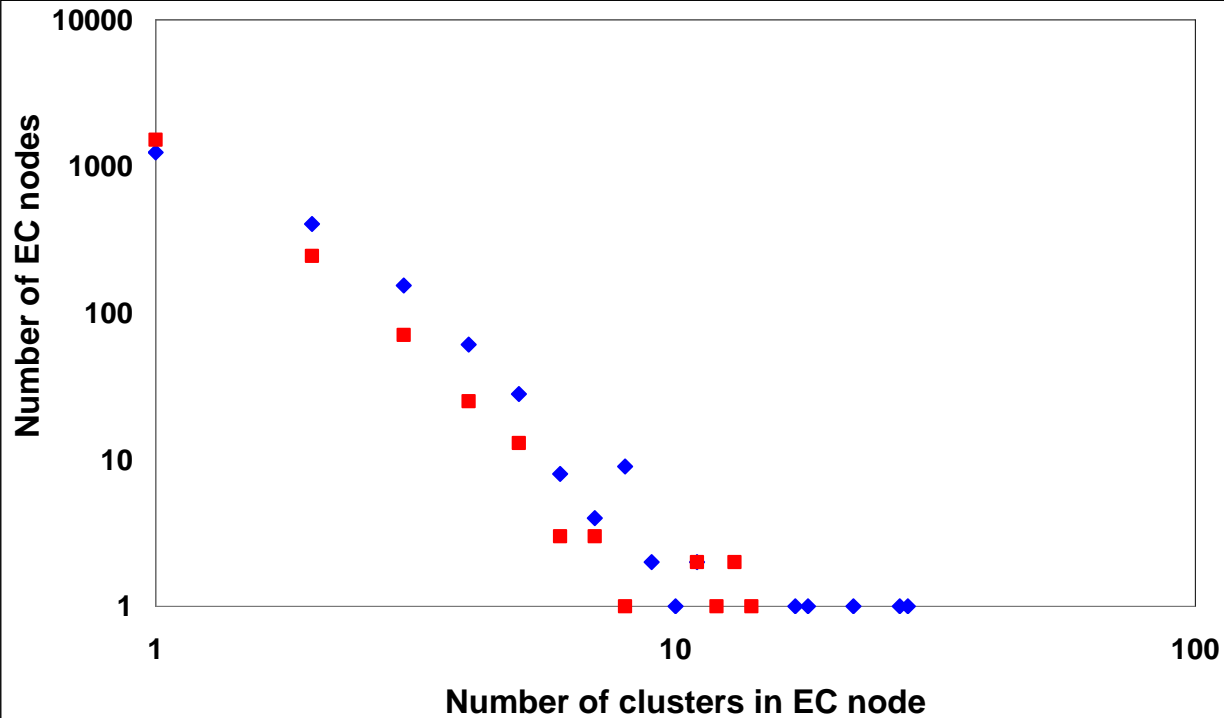

Supplement: 13062_2010_214_MOESM4_ESM.pdf [file 13062_2010_214_MOESM4_ESM.pdf]

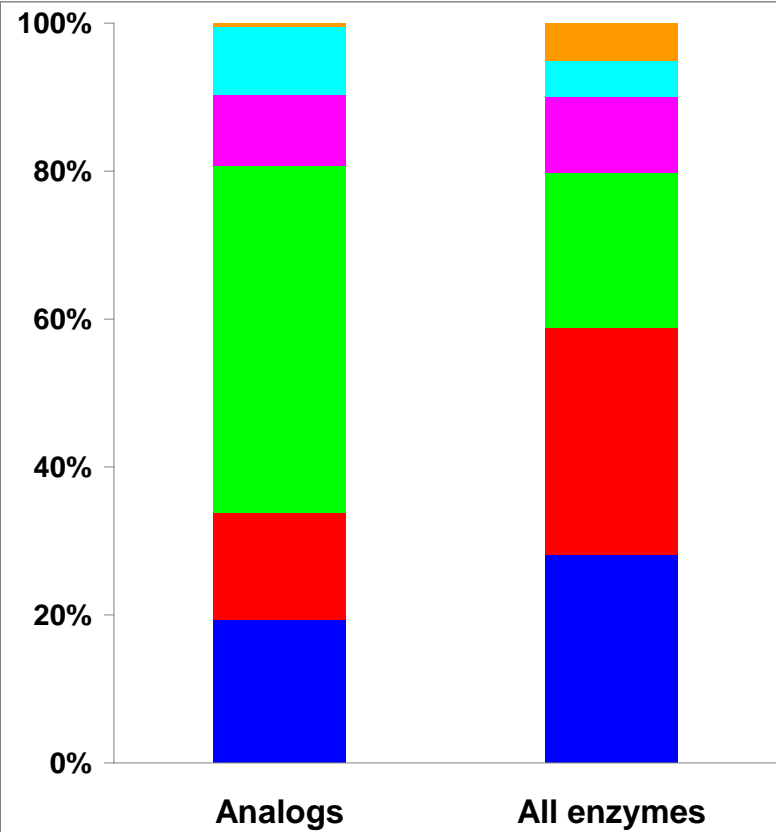

Supplement: 13062_2010_214_MOESM5_ESM.pdf [file 13062_2010_214_MOESM5_ESM.pdf]

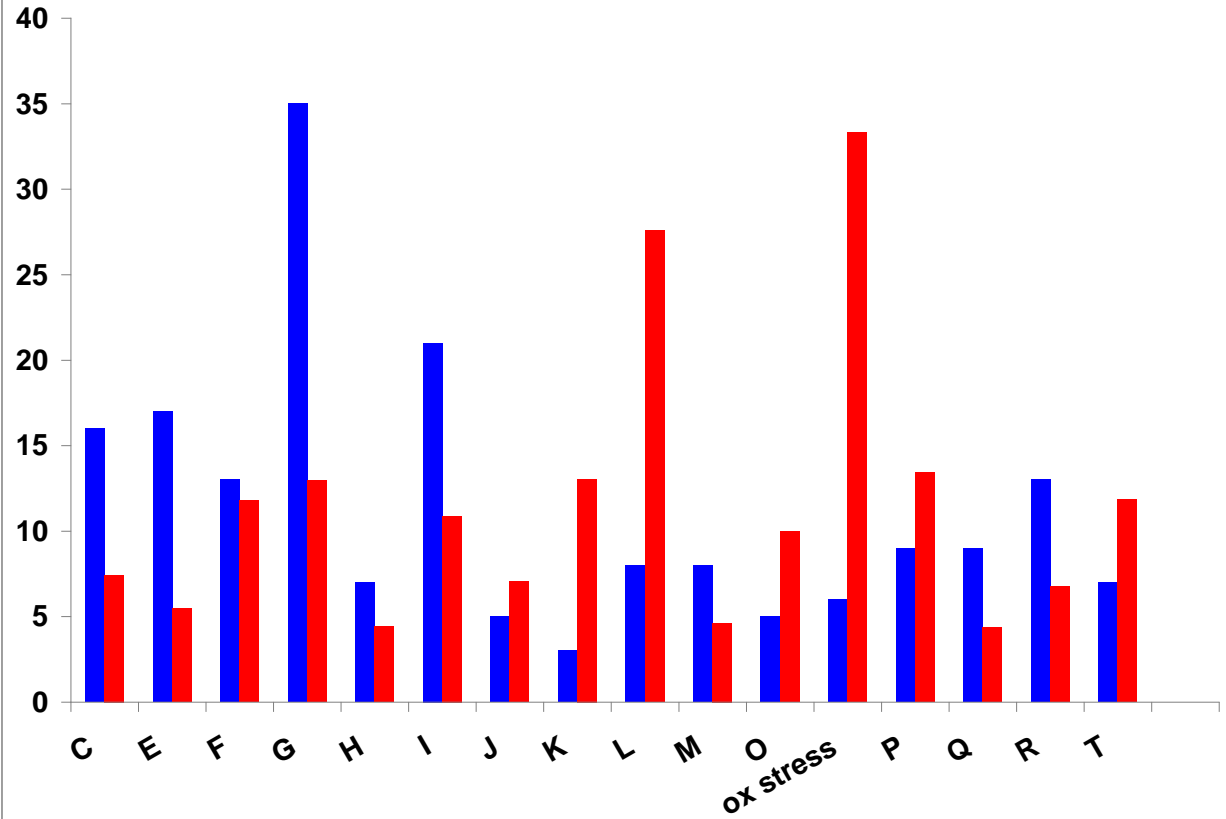

Supplement: 13062_2010_214_MOESM6_ESM.pdf [file 13062_2010_214_MOESM6_ESM.pdf]

**A**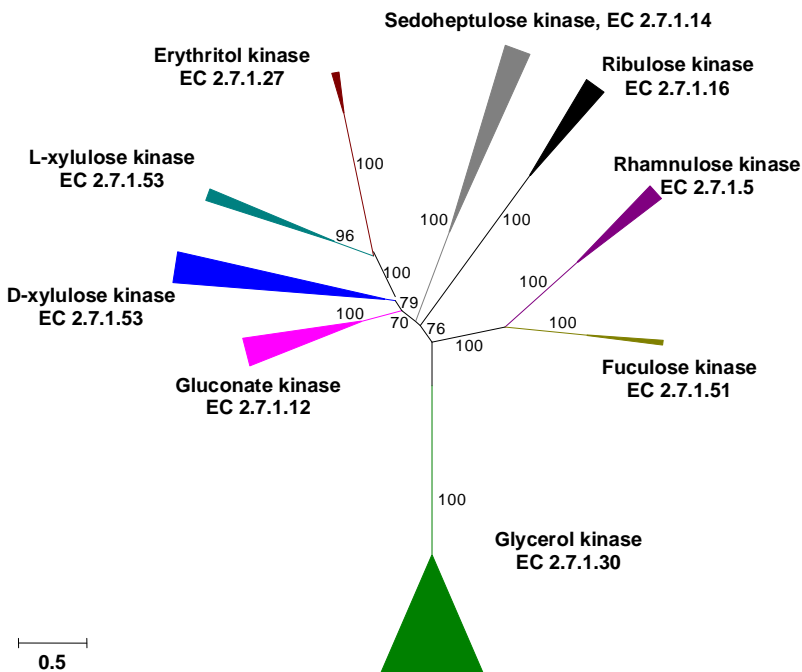**B**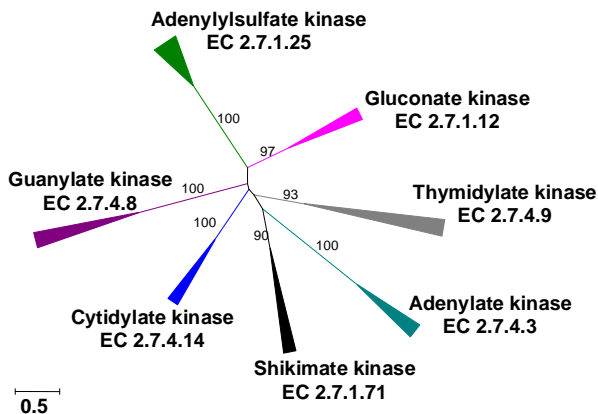

Supplement: 13062_2010_214_MOESM7_ESM.pdf [file 13062_2010_214_MOESM7_ESM.pdf]

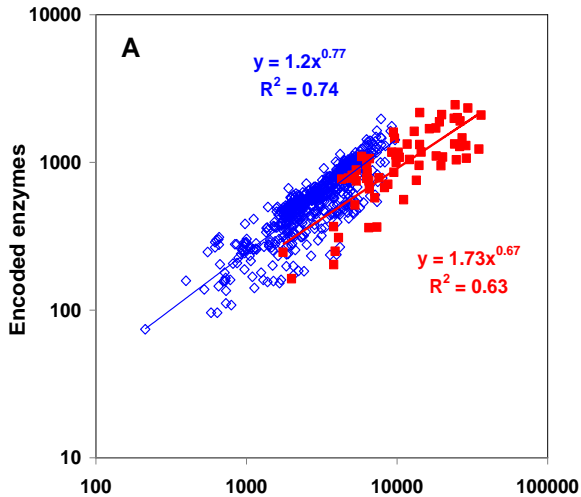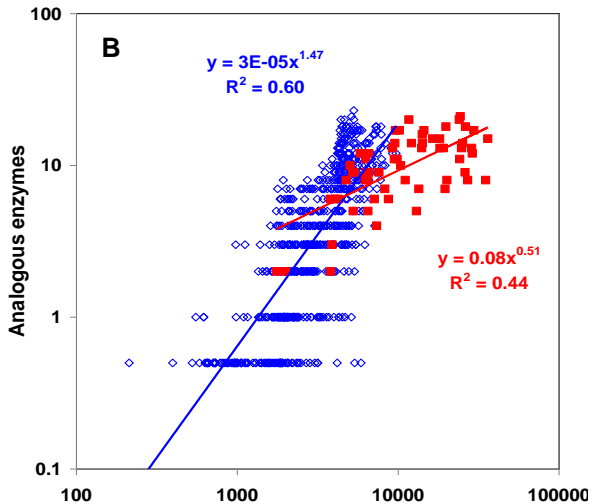

Supplement: 13062_2010_214_MOESM8_ESM.pdf [file 13062_2010_214_MOESM8_ESM.pdf]
